# Supplementary material
Source: Springer Nature journal article supplement (https://www.springermedizin.de/resource/supplementary/13256_2007_165_MOESM2_ESM.pdf/9645428)

R

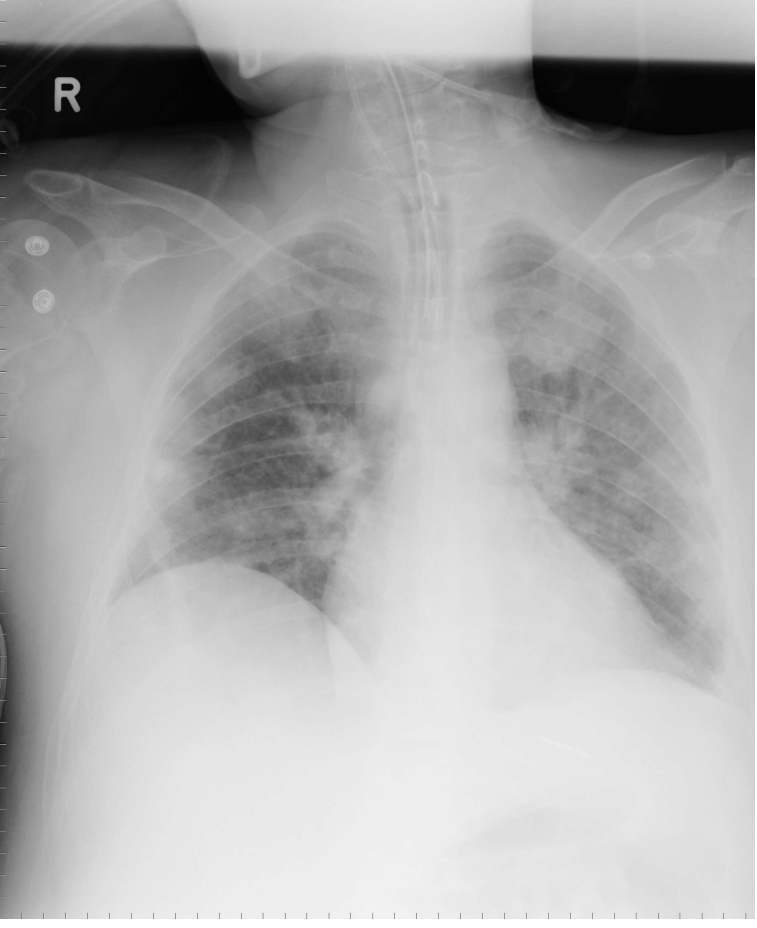

Supplement: MOESM2 [file 9645428]
